# Supplementary material
Source: PubMed Central journal article supplement (PMC4681514)

## Daoy

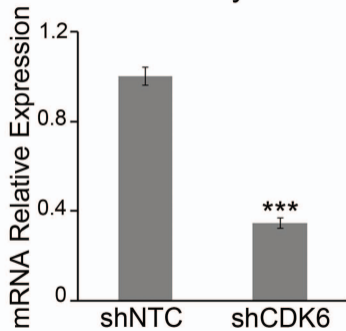

## ONS-76

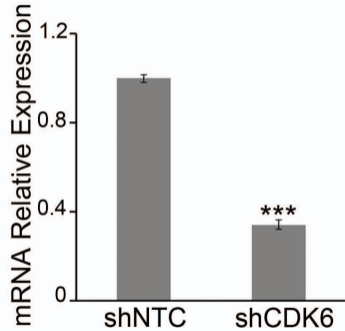

Supplement: NIHMS742748-supplement-Suppl_Fig_1.pdf [file NIHMS742748-supplement-Suppl_Fig_1.pdf]

## CDK6

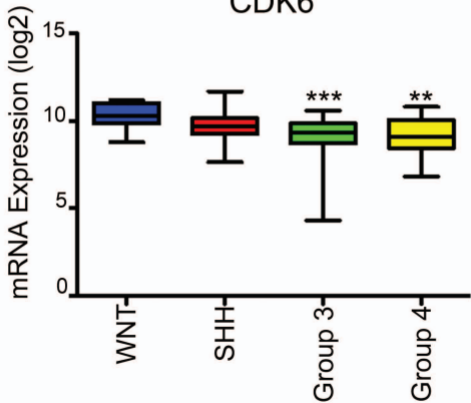

Supplement: NIHMS742748-supplement-Suppl_Fig_2.pdf [file NIHMS742748-supplement-Suppl_Fig_2.pdf]

## Daoy

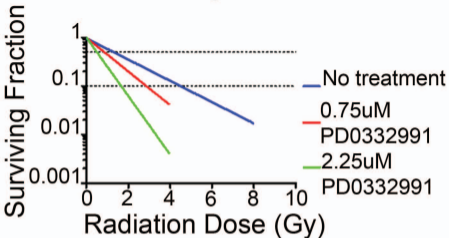

| R squared values |        |
|------------------|--------|
| No treatment     | 0.9834 |
| 0.75uM PD0332991 | 0.9679 |
| 2.25uM PD0332991 | 0.9623 |

## ONS-76

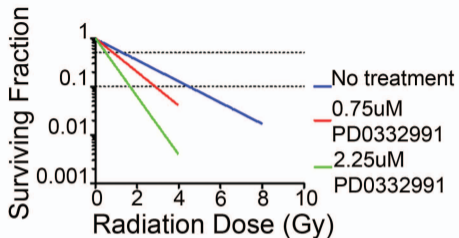

| R squared values |        |
|------------------|--------|
| No treatment     | 0.9859 |
| 0.75uM PD0332991 | 0.9670 |
| 2.25uM PD0332991 | 0.9731 |

Supplement: NIHMS742748-supplement-Suppl_Fig_3.pdf [file NIHMS742748-supplement-Suppl_Fig_3.pdf]
